# Supplementary material
Source: Springer Nature journal article supplement (https://www.springermedizin.de/resource/supplementary/12889_2009_2436_MOESM1_ESM.pdf/9485840)
Supplement: MOESM1 [file 9485840]

## Diabetes mellitus

Papers screened  
for retrieval  
(n=13,967)

Papers excluded on the  
basis of title and abstract  
(n=13,376)

Retrieved for more  
detailed information  
(n=591)

Papers excluded  
because not meeting  
inclusion criteria  
(n=554)

Papers included  
(n=10)

Papers not comparable  
(n=27)

## Obesity

Papers screened  
for retrieval  
(n=1,554)

Papers excluded on the  
basis of title and abstract  
(n=1,428)

Retrieved for more  
detailed information  
(n=126)

Papers excluded  
because not meeting  
inclusion criteria  
(n=76)

Papers included  
(n=14)

Papers not comparable  
(n=36)
